# Supplementary material for: Determination of mass concentrations of airborne PET microplastics using liquid chromatography coupled to tandem mass spectrometry (LC-MS/MS)
Source: Royal Society of Chemistry journal article supplement (doi:10.1039/d4ea00047a), 2024-01-01
Supplement: d4ea00047a4.pdf [file d4ea00047a4.pdf]

## **Supplementary Information**

### **Determination of mass concentrations of airborne PET microplastics using liquid chromatography coupled to tandem mass spectrometer (LC-MS/MS)**

**Durga Prasad Patnana<sup>a</sup>, B.P. Chandra<sup>a\*</sup>**

<sup>a</sup>Department of Chemistry, Sri Sathya Sai Institute of Higher Learning, Prasanthi Nilayam Campus, Puttaparthi, Andhra Pradesh – 515134, India

\* Corresponding author. Tel: +91 9491485589; E-mail address: [bpraphullachandra@sssihl.edu.in](mailto:bpraphullachandra@sssihl.edu.in)

**Table S1.** Liquid chromatography parameters for identification of terephthalic acid

**Table S2.** Mass spectrometer parameters for the determination of terephthalic acid

**Table S3.** Concentrations of PET MPs in blank filters

**Table S4.** Recovery rates of PET MPs using Quartz fiber and Teflon filters

**Figure S1.** (a) Picture showing the sampling locations in this study, (b) Google map image of PM<sub>2.5</sub> sampling site at Mohali, India (c) Google map image of PM<sub>2.5</sub> sampling site at Delhi, India (d) Picture showing the Speciation aerosol sampling systems (SASS sampler) installed on rooftop of IISER Mohali, India and (e) Picture showing the custom built PM<sub>2.5</sub> sampler installed on rooftop of IMD Delhi.

**Figure S2.** Total ion chromatogram and extracted ion chromatograms of standard terephthalic acid (TPA)

**Figure S3.** Linearity curve for terephthalic acid

**Table S1.** Liquid chromatography parameters for identification of terephthalic acid

| Time (min) | % of Mobile Phase A | % of Mobile Phase B | Flow rate (mL/min) |
|------------|---------------------|---------------------|--------------------|
| 0          | 90                  | 10                  | 0.2                |
| 1          | 90                  | 10                  | 0.2                |
| 3          | 10                  | 90                  | 0.2                |
| 7          | 10                  | 90                  | 0.2                |
| 8          | 90                  | 10                  | 0.2                |
| 10         | 90                  | 10                  | 0.2                |

Mobile Phase A: 0.01% formic acid in water and Mobile phase B: Methanol

**Table S2.** Mass spectrometer parameters for the determination of terephthalic acid

| Parameter                     | Value                                              |
|-------------------------------|----------------------------------------------------|
| Ion Source                    | Agilent Jett Stream Electrospray Ionization Source |
| Ionization mode               | Negative mode                                      |
| <b>Source parameters</b>      |                                                    |
| Gas temperature               | 200 °C                                             |
| Gas flow                      | 14 L min <sup>-1</sup>                             |
| Nebulizer pressure            | 20 psi                                             |
| Sheath gas heater temperature | 250 °C                                             |
| Sheath gas flow               | 11 L min <sup>-1</sup>                             |
| Capillary voltage             | 3000 V                                             |
| <b>MRM conditions</b>         | 165.0 – 121.0 (Q1)                                 |
|                               | 165.0 – 77.0 (Q2)                                  |

Q1: Quantifier ion & Q2: Qualifier ion

**Table S3.** Concentrations of PET MPs in blank filters

| Blanks   | Concentration (ng m <sup>-3</sup> ) |
|----------|-------------------------------------|
| Blank -1 | 6.48                                |
| Blank -2 | 5.60                                |
| Blank -3 | 3.31                                |
| Blank -4 | 8.14                                |
| Blank -5 | 4.32                                |
| Blank -6 | 7.75                                |

**Table S4.** Recovery rates of PET MPs using Quartz fiber and Teflon filters

| Filter Substrate    | Concentration of spike (ng) | Recovery (%) |
|---------------------|-----------------------------|--------------|
| Quartz Fiber filter | 50                          | 38.81        |
|                     | 100                         | 33.96        |
| Teflon filters      | 50                          | 125.95       |
|                     | 100                         | 116.32       |

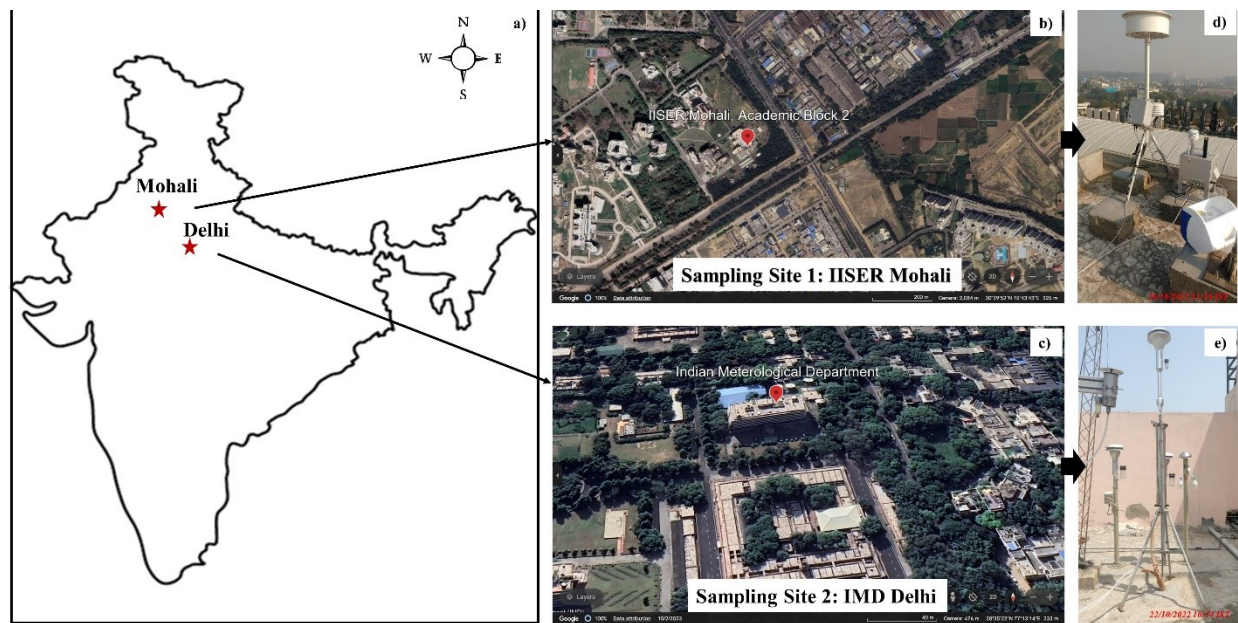

**Figure S1.** (a) Picture showing the sampling locations in this study, (b) Google map image of PM<sub>2.5</sub> sampling site at Mohali, India (c) Google map image of PM<sub>2.5</sub> sampling site at Delhi, India (d) Picture showing the Speciation aerosol sampling systems (SASS sampler) installed on the rooftop of IISER Mohali, India and (e) Picture showing the custom built PM<sub>2.5</sub> sampler installed on the rooftop of IMD Delhi.

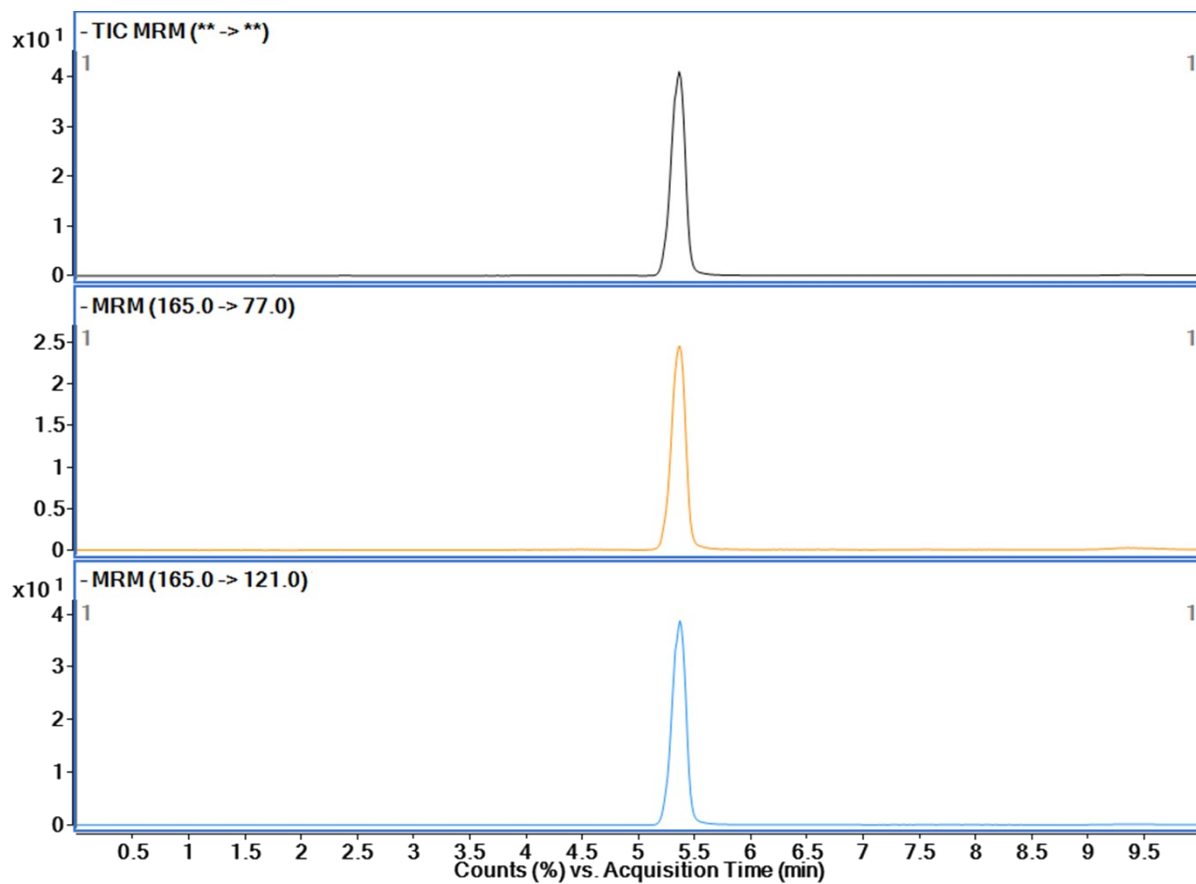

**Figure S2.** Total ion chromatogram and extracted ion chromatograms of standard terephthalic acid (TPA).

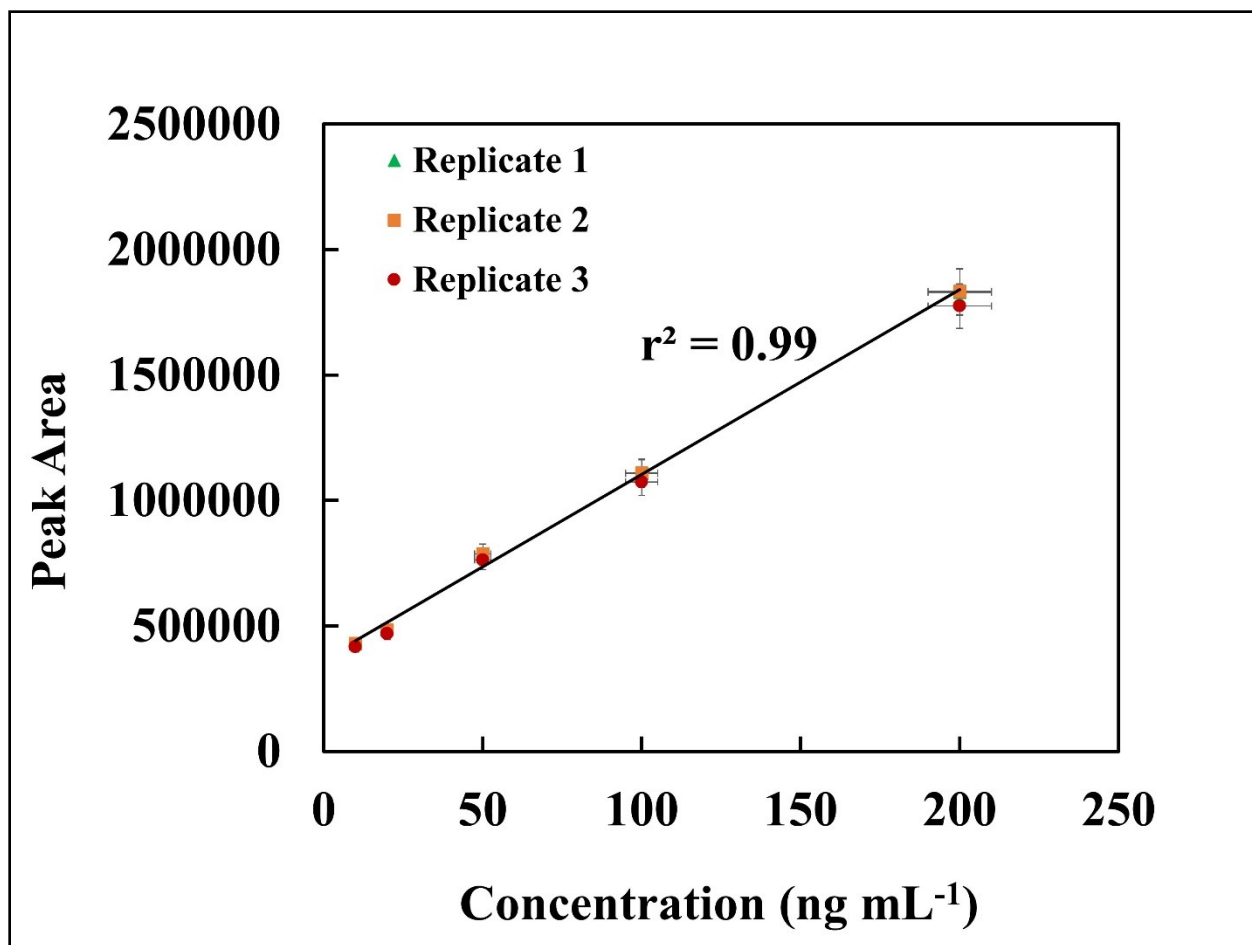

Figure S3. Linearity curve for terephthalic acid
