# Supplementary figures and images for: Determination of mass concentrations of airborne PET microplastics using liquid chromatography coupled to tandem mass spectrometry (LC-MS/MS)
Source: Royal Society of Chemistry journal article supplement (doi:10.1039/d4ea00047a), 2024-01-01

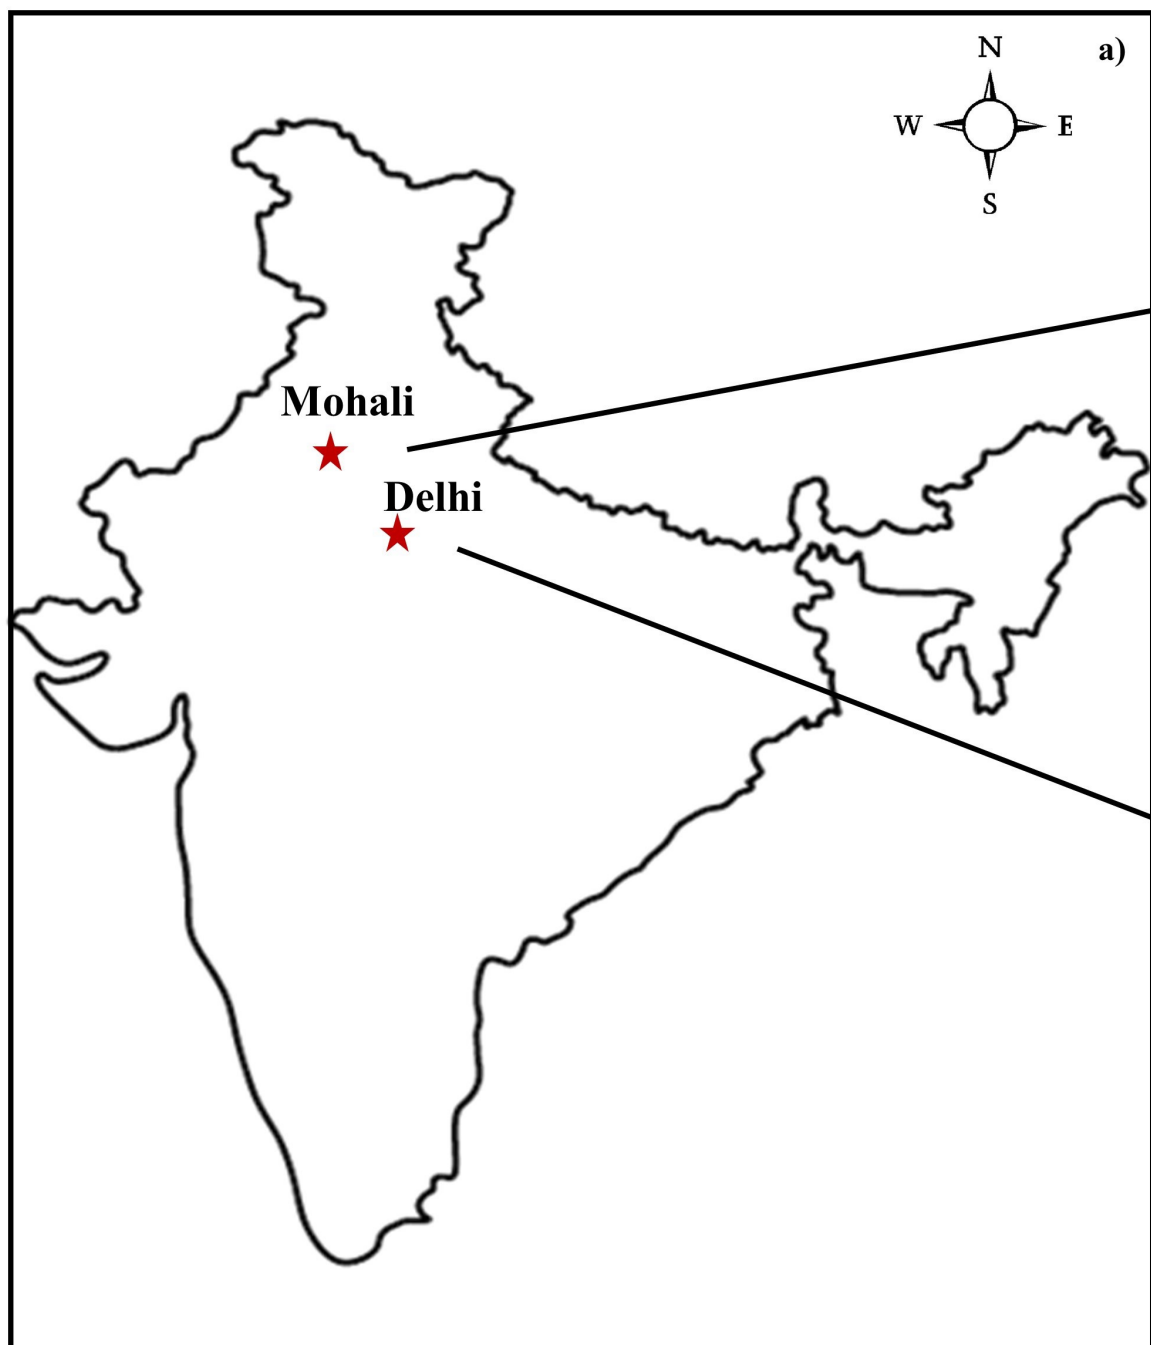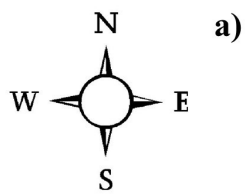

a)

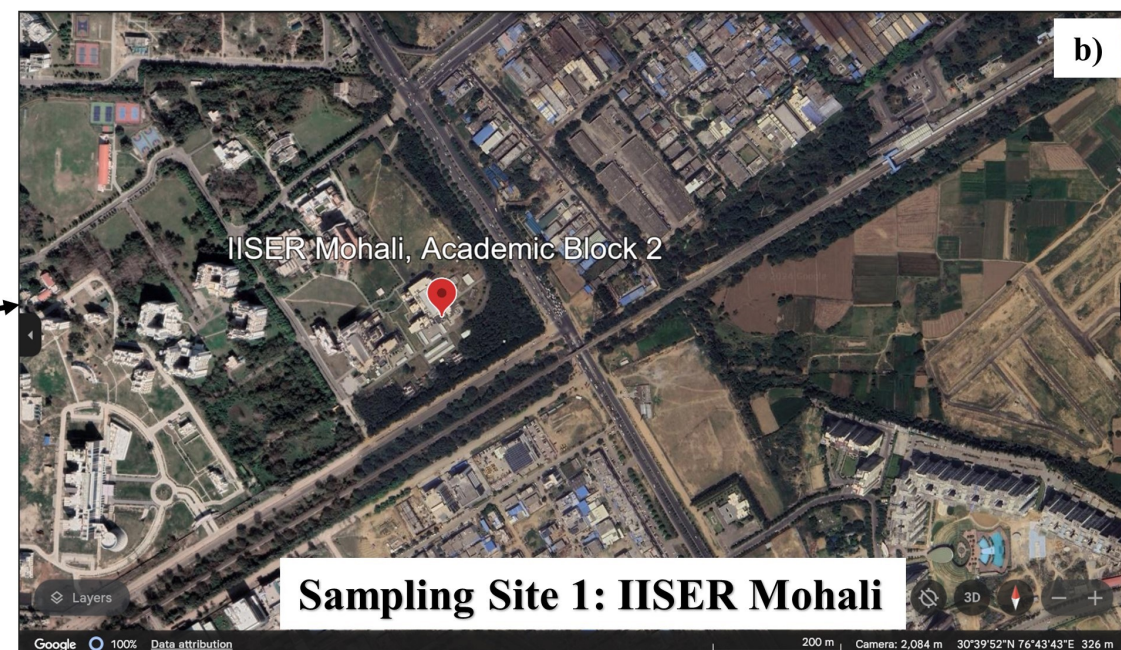

b)

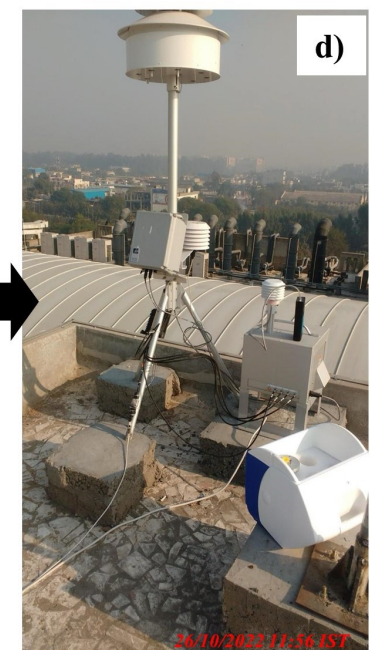

d)

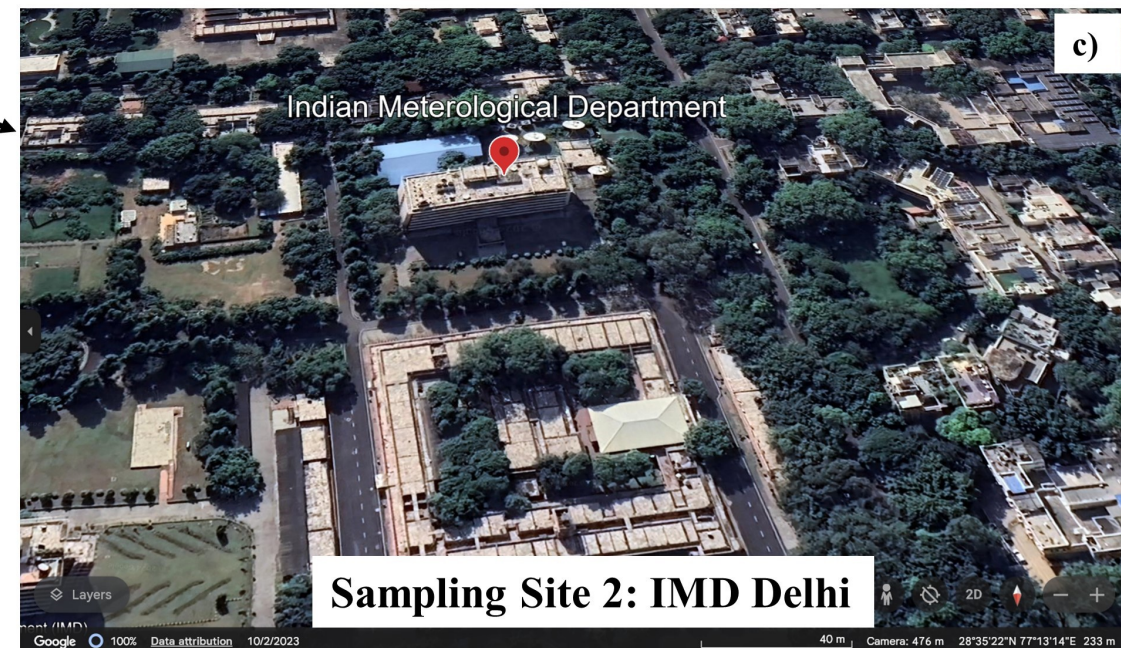

c)

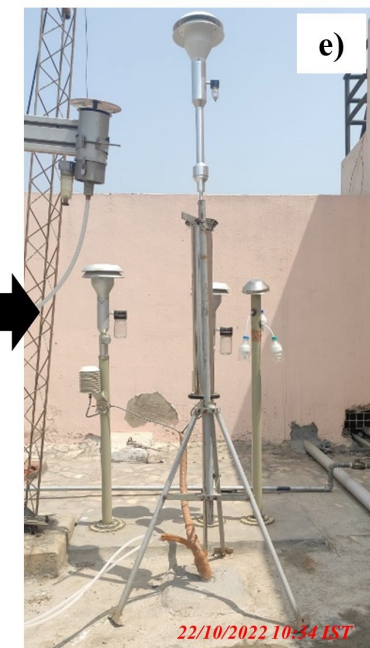

e)

Supplement: d4ea00047a1.pdf [file d4ea00047a1.pdf]

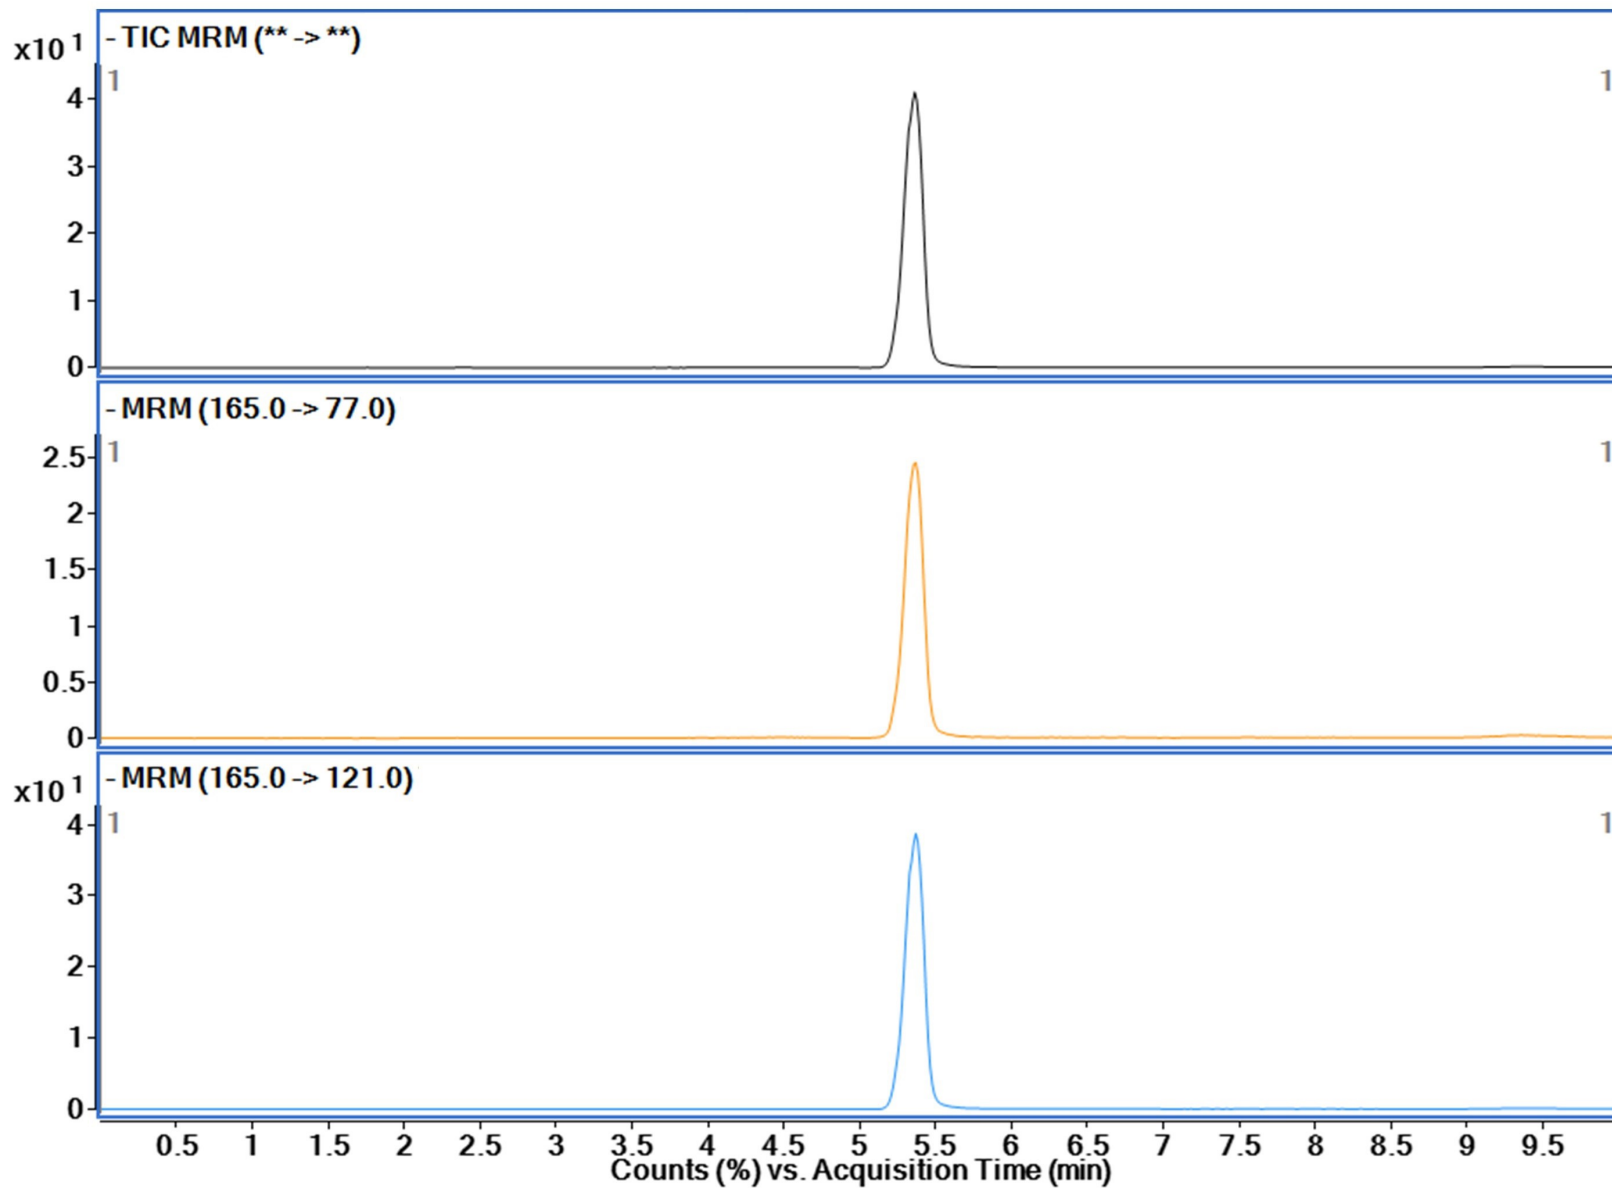

Supplement: d4ea00047a2.pdf [file d4ea00047a2.pdf]

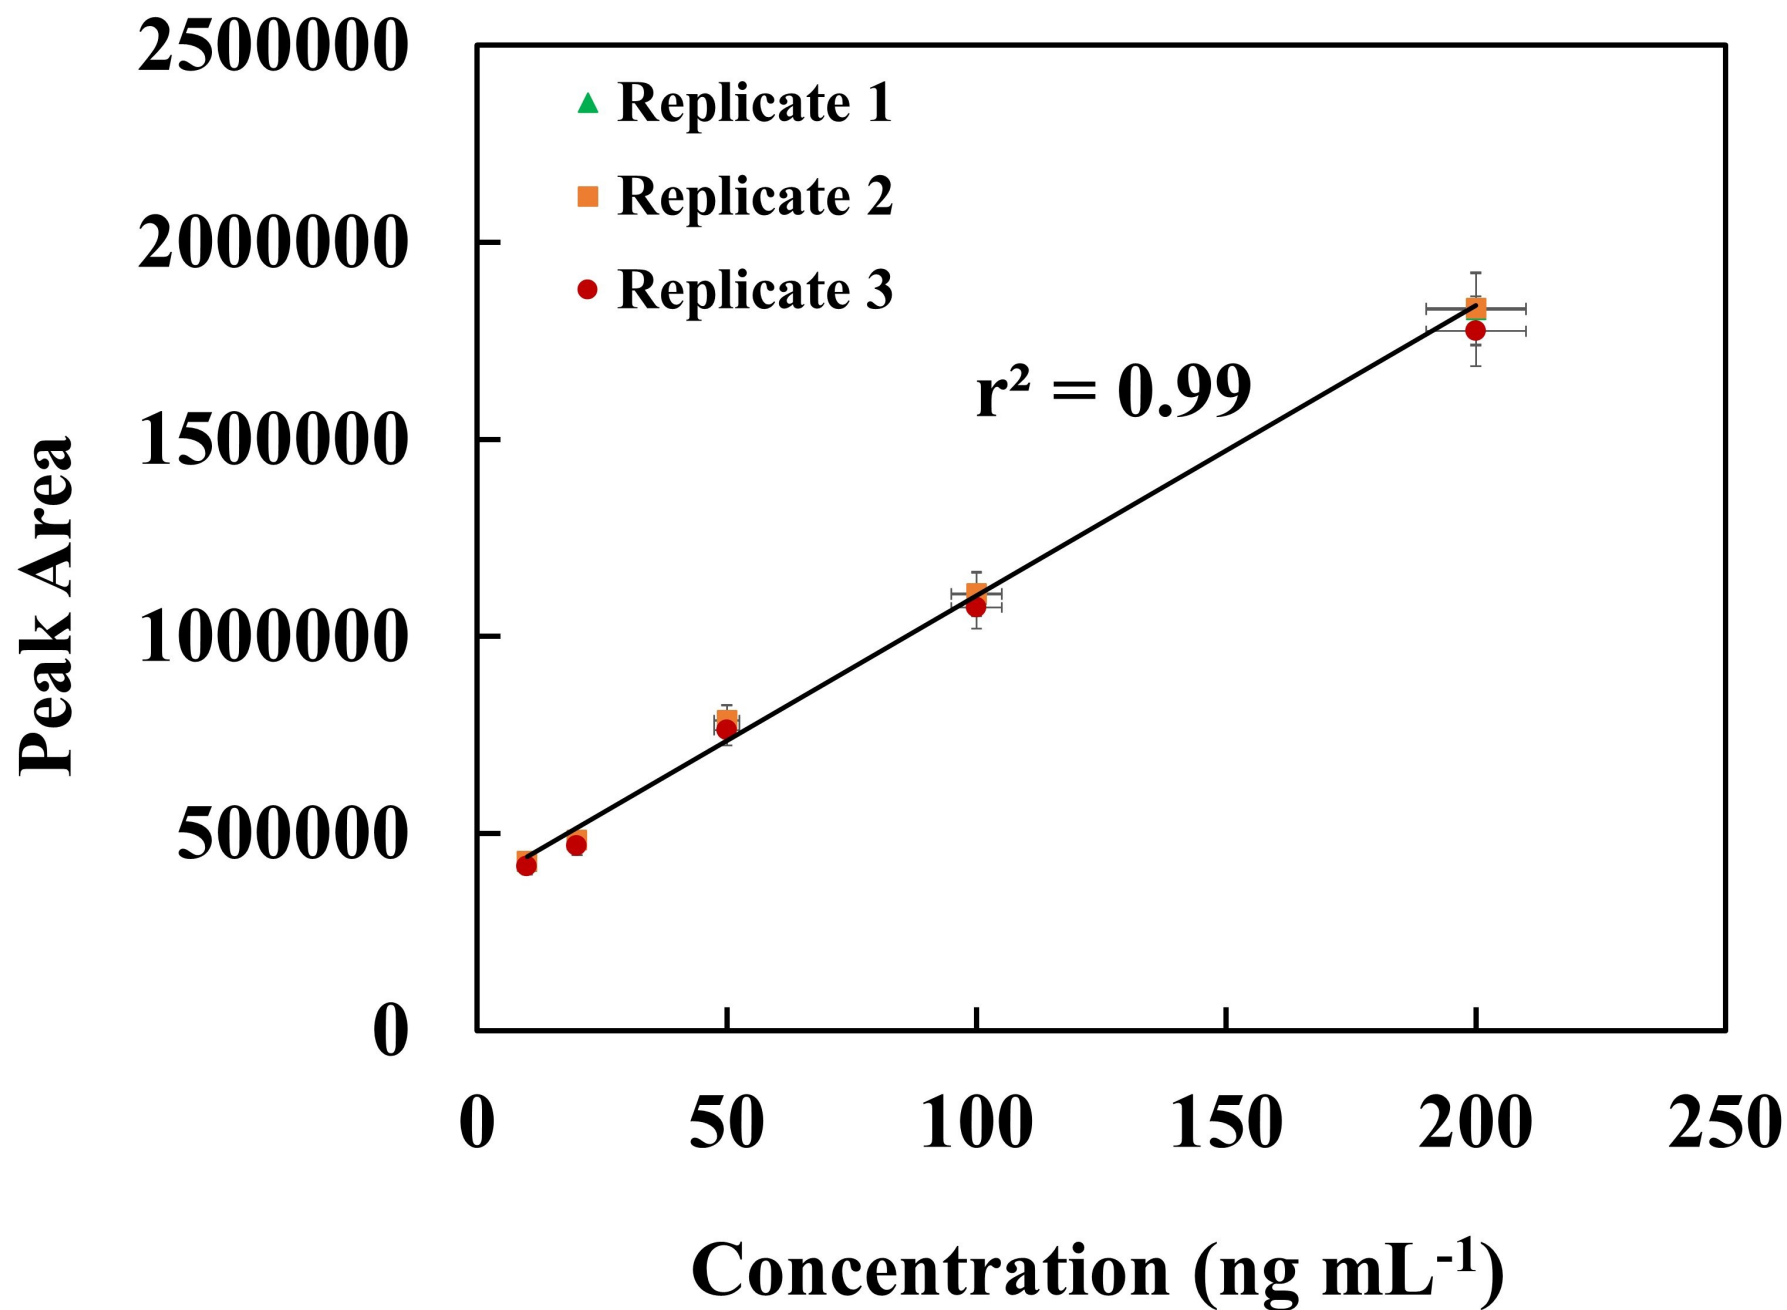

Supplement: d4ea00047a3.pdf [file d4ea00047a3.pdf]
